# Supplementary material for: Role of SIRT-3, p-mTOR and HIF-1α in Hepatocellular Carcinoma Patients Affected by Metabolic Dysfunctions and in Chronic Treatment with Metformin
Source: MDPI journal article supplement (doi:10.3390/ijms20061503), 2019-03-26
Supplement: s1 [file s1]

**Table S1.** Staining intensity of the SIRT-3 and p-mTOR expression in early-and advantage stage HCC patients.

| Intensity            | Early-stage HCC patients         |                                  | Advanced-stage HCC patients      |                                  |
|----------------------|----------------------------------|----------------------------------|----------------------------------|----------------------------------|
|                      | SIRT-3<br><i>No. patient (%)</i> | p-mTOR<br><i>No. patient (%)</i> | SIRT-3<br><i>No. patient (%)</i> | p-mTOR<br><i>No. patient (%)</i> |
| <b>0 (absent)</b>    | 5 (10.9)                         | 23 (85.2)                        | 4 (19.0)                         | 13 (81.2)                        |
| <b>1+ (weak)</b>     | 10 (21.7)                        | 3 (11.1)                         | 2 (9.5)                          | 2 (12.5)                         |
| <b>2+ (moderate)</b> | 19 (41.3)                        | 1 (3.7))                         | 6 (28.6)                         | 0                                |
| <b>3+ (strong)</b>   | 12 (26.1)                        | 0                                | 9 (42.9)                         | 1 (6.3)                          |

**Table S2.** Expression of SIRT-3 and p-mTOR in non-cancerous adjacent liver tissue from HCC patients with metabolic dysfunctions.

|                                                    | Non-cancerous adjacent liver tissue |          |                    |                 |          |                    |
|----------------------------------------------------|-------------------------------------|----------|--------------------|-----------------|----------|--------------------|
|                                                    | SIRT-3                              |          |                    | p-mTOR          |          |                    |
|                                                    | No.<br>patients                     | Negative | Slight<br>positive | No.<br>patients | Negative | Slight<br>positive |
| <b>Presence of diabetes and metabolic syndrome</b> | 9                                   | 7/9      | 2/9                | 5               | 5/5      | 0                  |
| <b>Only diabetes</b>                               | 8                                   | 4/8      | 4/8                | 3               | 3/3      | 0                  |
